# Supplementary material for: Moleculo Long-Read Sequencing Facilitates Assembly and Genomic Binning from Complex Soil Metagenomes
Source: PubMed Central journal article supplement (PMC5069762; doi:10.1128/msystems.00045-16), 2016-06-28
Supplement: sys003162031sf2.pdf [file sys003162031sf2.pdf]

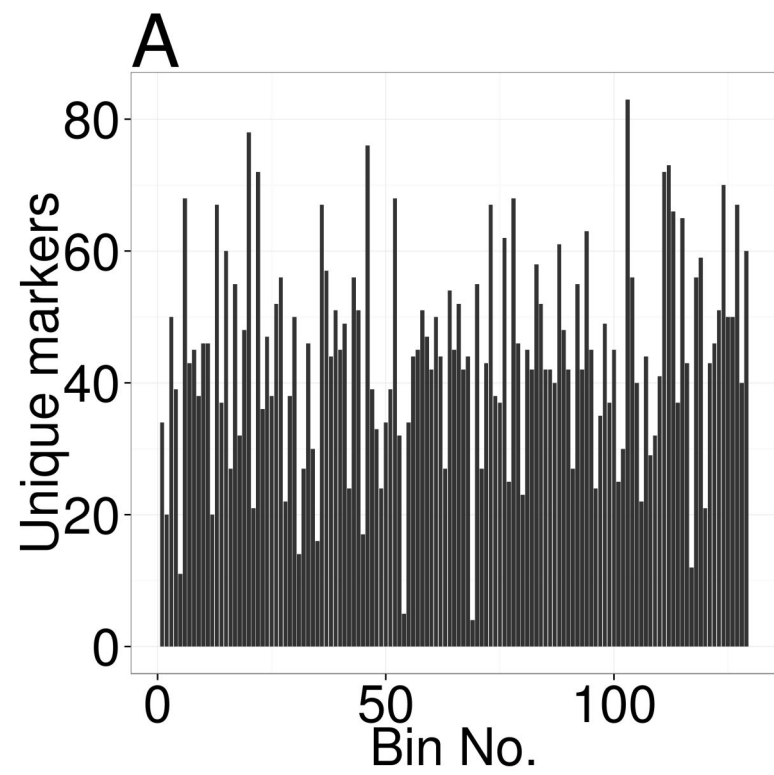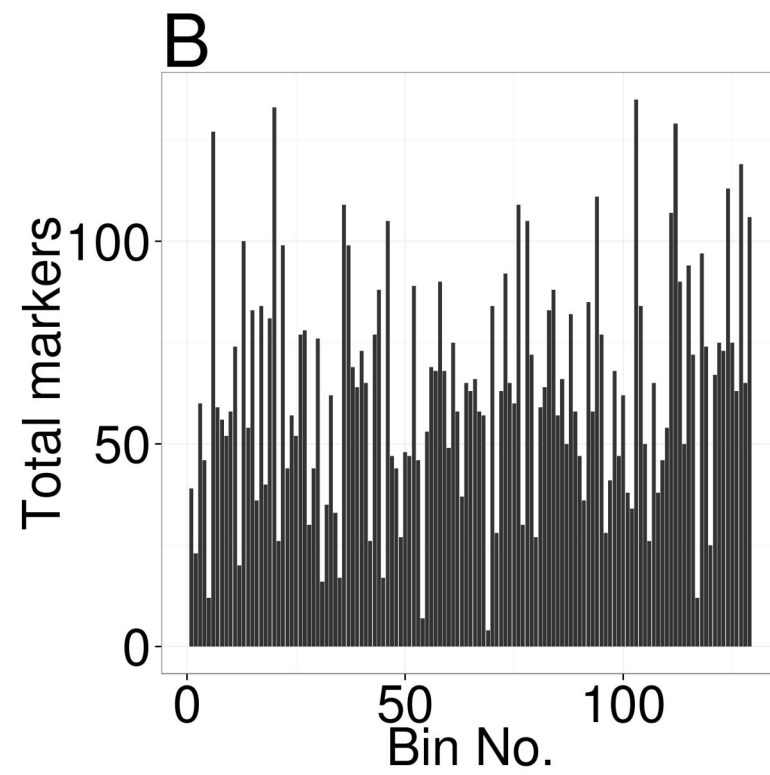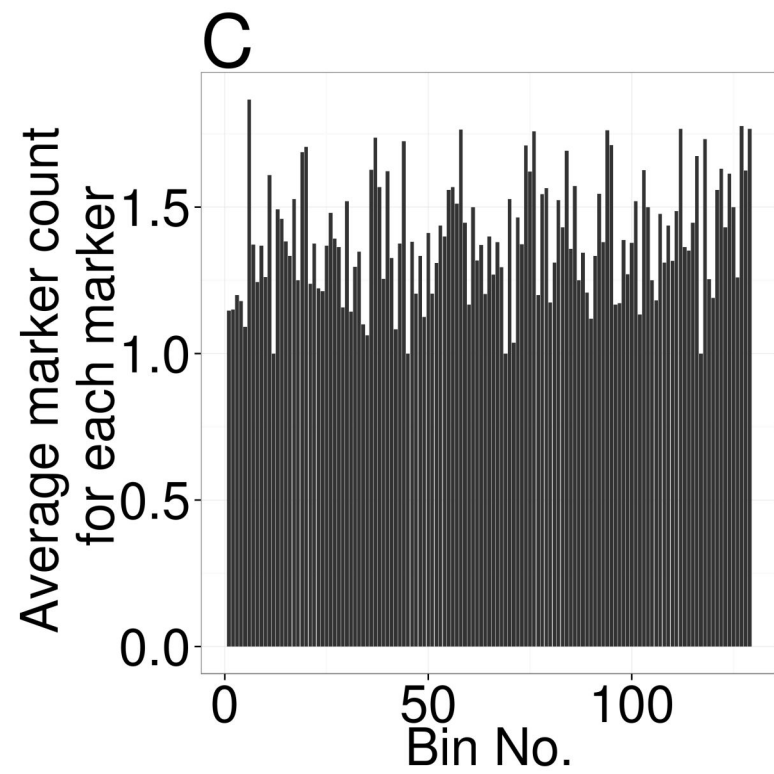

Figure S2
